# Supplementary material for: Metformin inhibits SUV39H1-mediated migration of prostate cancer cells
Source: PubMed Central journal article supplement (PMC5523061; doi:10.1038/oncsis.2017.28), 2017-05-01
Supplement: oncsis201728x3.pdf [file oncsis201728x3.pdf]

## Figure S2

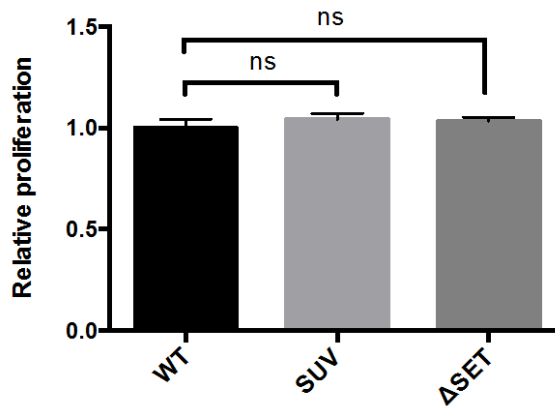

**Figure S2.** Cell proliferation of C4-2B WT, SUV39H1 and SUV39H1 $\Delta$ SET over-expressing cells. Cells were plated in triplicate in 48-well plates ( $2 \times 10^4$  cells/well). After 72 h, cells were stained with crystal violet followed by OD measurement. Relative proliferation was calculated with the OD values normalized to control WT cells. Data shown are mean  $\pm$  SEM ( $n \geq 3$ ). ns, no significant.
